# Supplementary material for: Effect of Alpha Lipoic Acid Supplementation on Oxidative Stress and Lipid Parameters in Women Diagnosed with Low-Grade Squamous Intraepithelial Lesions (LSILs): A Double-Blind, Randomized, Placebo-Controlled Trial
Source: MDPI journal article supplement (doi:10.3390/antiox12091670), 2023-08-25
Supplement: s1 [file s1]

**Table S2.** Diet characteristics of study participants as assessed by semiquantitative food frequency questionnaire (FFQ)

| Average daily intake     | Median        | Min        | Max        |
|--------------------------|---------------|------------|------------|
| Water (g)                | 1855          | 466        | 6409       |
| Energy (kcal)            | 3160          | 586        | 8487       |
| Protein (g)              | 81,8          | 20,8       | 416,1      |
| AMDR protein (%)         | 11,3          | 1,7        | 24,3       |
| Fat (g)                  | 186,0         | 24,3       | 1695       |
| AMDR fat (%)             | 53,7          | 25,7       | 94,6       |
| SF) (g)                  | 62,2          | 8,0        | 377,6      |
| AMDR saturated fat (%)   | 17,01         | 9,36       | 32,74      |
| MUFA (g)                 | 59,9          | 10         | 791,2      |
| PUFA (g)                 | 48,07         | 3,76       | 479,0      |
| PUFA/SF ratio            | 0,85          | 0,16       | 2,6        |
| MUFA/SF ratio            | 0,93          | 0,50       | 4,74       |
| Cholesterol (mg)         | 299,8         | 51,8       | 1402       |
| Carbohydrates (g)        | 297,2         | 55,8       | 781,0      |
| Dietary fibre (g)        | 32,08         | 5,19       | 141,1      |
| Vitamin A (µg RAE)       | 773,4         | 70,8       | 4896       |
| Retinol (µg)             | 404,7         | 18,1       | 2834       |
| β-carotene (µg)          | 2552          | 23,0       | 12599      |
| Lycopene (µg)            | 3524          | 0,00       | 111585     |
| Lutein + zeaxanthin (µg) | 3612          | 117,1      | 20094      |
| Vitamin D (µg)           | 3,6           | 0,25       | 44,4       |
| Vitamin E (mg)           | 29,16         | 1,41       | 353,4      |
| Vitamin K (µg)           | 193,9         | 21,1       | 1516       |
| Thiamine-B1 (mg)         | 1,72          | 0,41       | 5,41       |
| Riboflavin-B2 (mg)       | 2,35          | 0,47       | 9,82       |
| Niacin-B3 (mg)           | 23,4          | 6,45       | 85,4       |
| Pantothenic acid-B5 (mg) | 6,48          | 1,37       | 24,9       |
| Pyridoxine-B6 (mg)       | 2,15          | 0,32       | 6,51       |
| Folate-B9 (µg)           | 377           | 70,8       | 2017       |
| Choline (mg)             | 342,3         | 55,9       | 1398       |
| Cobalamins-B12 (µg)      | 4,71          | 0,56       | 23,8       |
| Vitamin C                | 192,2         | 11,5       | 1496       |
| Calcium (mg)             | 958,5         | 184,9      | 6468       |
| Iron (mg)                | 16,4          | 4,15       | 77,8       |
| Magnesium (mg)           | 430,5         | 96,9       | 1575       |
| Phosphorus (mg)          | 1383          | 382,2      | 5934       |
| Zinc (mg)                | 10,74         | 2,88       | 39,7       |
| Copper (mg)              | 1,84          | 0,43       | 10,0       |
| Manganese (mg)           | 4,15          | 0,54       | 12,2       |
| Selenium (µg)            | 95,9          | 19,2       | 542,2      |
| Potassium (mg)           | 4070          | 941        | 13336      |
| Sodium (mg)              | 1757          | 311,0      | 11879      |
| <b>Weekly intake</b>     | <b>median</b> | <b>min</b> | <b>max</b> |
| Fruit (serving)          | 3,54          | 0,06       | 18,9       |
| Vegetable (serving)      | 3,71          | 0,26       | 23,9       |

AMDR-acceptable macronutrient distribution ranges; SF-saturated fat; PUFA-polyunsaturated fatty acid;  
MUFA-monounsaturated fatty acid; RAE-retinol activity equivalents
