# Supplementary material for: Effect of Alpha Lipoic Acid Supplementation on Oxidative Stress and Lipid Parameters in Women Diagnosed with Low-Grade Squamous Intraepithelial Lesions (LSILs): A Double-Blind, Randomized, Placebo-Controlled Trial
Source: MDPI journal article supplement (doi:10.3390/antiox12091670), 2023-08-25
Supplement: s1 [file s1]

**Table S3.** Changes of other anthropological and biochemical markers between the initial and the 3-month follow-up appointment in placebo- and intervention group.

|                                       | placebo initial     | placebo 3-month follow up | P*     | intervention initial | intervention 3-month follow-up | P**    |
|---------------------------------------|---------------------|---------------------------|--------|----------------------|--------------------------------|--------|
| <sup>1</sup> body mass (kg)           | 59<br>(48-76)       | 57<br>(50-71)             | 0.353  | 63<br>(49-81)        | 60<br>(49-77)                  | 0.429  |
| <sup>1</sup> BMI (kg/m <sup>2</sup> ) | 25.0<br>(21.6-27.1) | 24.8<br>(21.9-27.0)       | 0.727  | 23.9<br>(21.6-26.9)  | 23.6<br>(21.4-27.1)            | 0,613  |
| <sup>1</sup> hsCRP* (mg/L)            | 0.86<br>(0.47-1.32) | 1.11<br>(0.61-1.98)       | <0.001 | 1.77<br>(0.82-2.44)  | 0.89<br>(0.39-1.68)            | <0.001 |
| <sup>1</sup> FI* (g/L)                | 3.30<br>(2.4-3.9)   | 3.7<br>(2.7-4.5)          | <0.001 | 3.9<br>(3.1-4.4)     | 3.3<br>(2.6-3.8)               | <0.001 |
| <sup>1</sup> SE* (mm/h)               | 16<br>(12-23)       | 20<br>(16-26)             | <0.001 | 20<br>(15-26)        | 16<br>(12-22)                  | <0.001 |
| <b>increased</b>                      |                     |                           |        | <b>decreased</b>     |                                |        |
|                                       | <b>placebo</b>      | <b>intervention</b>       |        | <b>placebo</b>       | <b>intervention</b>            |        |
| <b>IL6</b>                            | 3                   | 0                         |        | 0                    | 11                             |        |

Results are expressed as medians (interquartile range) <sup>1</sup>Tested by the Mann-Whitney's test; comparing the values in the initial and the 3-month follow-up visit in placebo treated group. \*data adopted from Divković and co-authors [10].
