# Supplementary figures and images for: Effect of Alpha Lipoic Acid Supplementation on Oxidative Stress and Lipid Parameters in Women Diagnosed with Low-Grade Squamous Intraepithelial Lesions (LSILs): A Double-Blind, Randomized, Placebo-Controlled Trial
Source: MDPI journal article supplement (doi:10.3390/antiox12091670), 2023-08-25

## CONSORT 2010 Flow Diagram

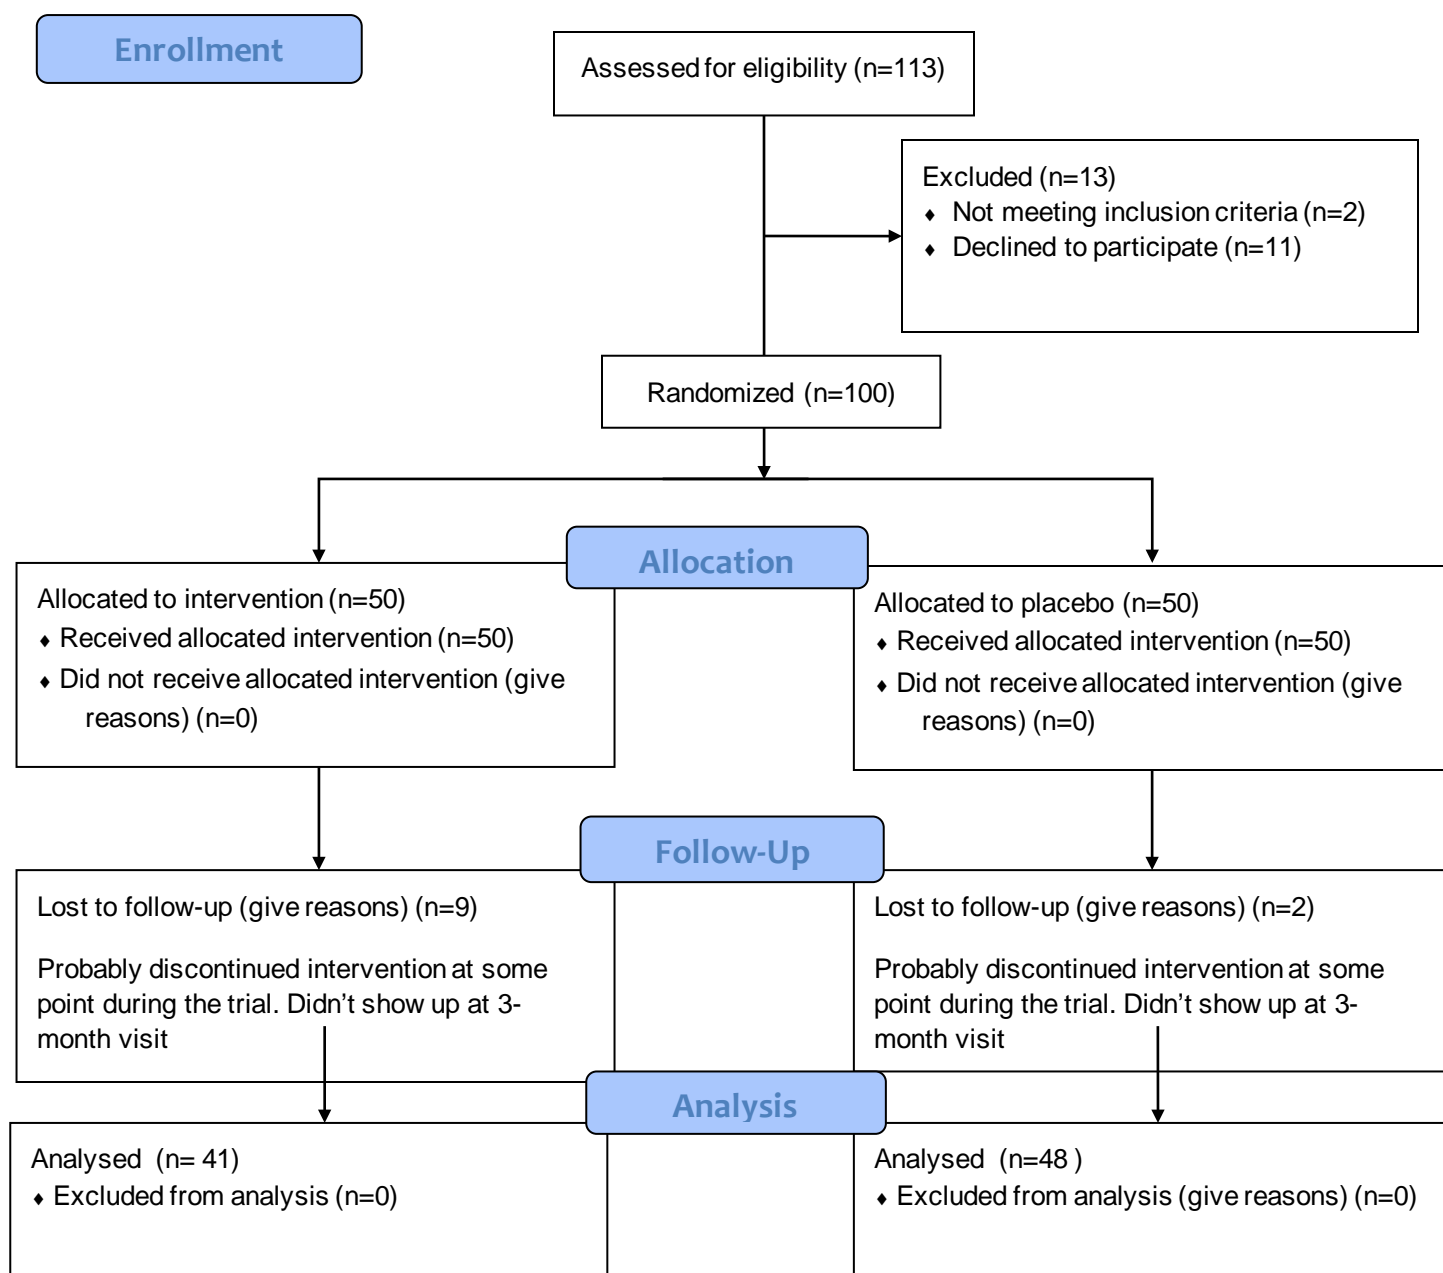

Supplement: s1 [file s1]
